**Characteristics of Cardiac Memory in Patients with Implanted Cardioverter Defibrillator:  
the CAMI study**

Kazi T. Haq<sup>1</sup>, PhD, Jian Cao<sup>2</sup>, PhD, and Larisa G. Tereshchenko<sup>1</sup>, MD, PhD

From

<sup>1</sup>Knight Cardiovascular Institute, Oregon Health and Science University, Portland, OR,

<sup>2</sup>Medtronic, Inc, Minneapolis, MN.

**Brief title:** cardiac memory in ICD patients

Correspondence: Larisa Tereshchenko, 3181 SW Sam Jackson Park Rd; UHN62; Portland, OR,  
97239. E-mail:tereshch@ohsu.edu. Phone: 503-494-7400; Fax: 503-494-8550.

Funding Sources: This research was supported in part by the National Institute of Health  
HL118277 (LGT).

Conflict of interest: the CAMI study was sponsored by Medtronic, Inc.

Total words: 6125

## Abstract

**Background**—Cardiac memory (CM) was known as a repolarization phenotype, an adaptive response of the heart on abnormal ventricular activation. The goal of this study was to determine factors associated with CM in patients receiving implantable cardioverter-defibrillators (ICD). We hypothesized that preexisted cardiac remodeling is associated with CM.

**Methods**—Patients with structural heart disease (n=20; mean age  $72.6 \pm 11.6$  y; 80% male; mean left ventricular ejection fraction (LVEF)  $31.7 \pm 7.6\%$ ; history of myocardial infarction (MI) in 75%, ventricular tachycardia (VT) in 85%) and preserved atrioventricular (AV) conduction received primary (80%) or secondary (20%) prevention dual-chamber ICD. Standard 12-lead ECG was recorded in AAI and DDD mode, immediately after ICD implant and after 7 days of right ventricular (RV) pacing in DDD mode with short AV delay. Direction (azimuth and elevation) and magnitude of spatial QRS, T, and ventricular gradient (SVG) vectors were measured immediately after implant and after 7 days of RV pacing. CM was quantified as the degree of alignment between  $QRS_{DDD-7}$  and  $T_{AAI-7}$  vectors ( $QRS_{DDD-7}-T_{AAI-7}$  angle). Circular statistics and mixed models with a random slope and intercept were adjusted for days 1-7 change in cardiac activation, LVEF, known risk factors, and use of medications known to affect CM.

**Results**— $QRS_{DDD-7}-T_{AAI-7}$  angle strongly correlated (circular  $r = -0.972$ ;  $P < 0.0001$ ) with  $T_{AAI-7}-T_{DDD-7}$  angle. Baseline  $T_{DDD-1}$  azimuth correlated with  $QRS_{AAI-7}-QRS_{DDD-7}$  angle (circular  $r = 0.604$ ;  $P < 0.001$ ). In the mixed models, history of MI ( $-180^\circ$  (95%CI  $-320^\circ$  to  $-40^\circ$ );  $P = 0.011$ ) and female sex ( $-162^\circ$  (95%CI  $-268^\circ$  to  $-55^\circ$ );  $P = 0.003$ ) counteracted CM-T azimuth changes ( $+132^\circ$  (95%CI  $80^\circ$ - $184^\circ$ );  $P < 0.0001$ ). History of VT ( $+27$  (95%CI  $4$ - $46$ )  $mV \cdot ms$ ;  $P = 0.007$ ) amplified CM-T area increase ( $+15$  (95%CI  $6$  –  $24$ )  $mV \cdot ms$ ;  $P < 0.0001$ ).

**Conclusions**—Existing cardiac remodeling due to MI and VT significantly affects the degree of CM in response to RV pacing. Women develop less CM than men. Activation memory manifests as a smaller angle between QRS vectors of normal and abnormal activation.

**Keywords:** cardiac memory; vectorcardiogram.

## Introduction

Right ventricular (RV) apical pacing can cause pacing-induced cardiomyopathy<sup>1,2</sup>: nearly every fifth patient develops pacing-induced cardiomyopathy if RV pacing burden  $\geq 20\%$ <sup>3,4</sup>. Biventricular pacing and His bundle pacing<sup>5</sup> are more physiological, but also more technically challenging pacing approaches. An informed clinical decision regarding the choice of pacing approach should be based on the evaluation of risks and benefits for each patient. Unfortunately, it remains largely unknown which factors (besides pacing burden) are associated with pacing-induced cardiomyopathy.

RV pacing changes activation pathway and induces complex repolarization phenomenon of cardiac memory (CM).<sup>6</sup> CM is a form of cardiac remodeling caused by altered myocardial stretch.<sup>7</sup> Altered ventricular stretch and subsequent local cardiac angiotensin II release but not altered ventricular activation initiates CM.<sup>8</sup> The T wave changes of CM result from underlying changes in ion channels ( $I_{to}$ ,  $I_{kr}$ ,  $I_{Ca,L}$ ) and connexin43 remodeling.<sup>7</sup> CM can be fully reversible after return to normal activation pathway. All these facts suggest that the amount of CM developed in response to RV pacing is likely associated with clinical outcomes. However, while molecular mechanisms of CM have been extensively studied,<sup>6</sup> its translation into clinical practice has been limited.<sup>9</sup> Current clinical perception of CM is restricted by recognition of T wave inversion that develops after a period of altered ventricular activation once normal ventricular activation is restored, differentiating CM from ischemic T wave inversion.<sup>10</sup>

Previously, CM was studied in patients undergoing pacemaker implantation.<sup>11</sup> An interaction of RV pacing-induced CM with preexisted cardiac remodeling [e.g. after myocardial infarction (MI) and ventricular tachycardia (VT)] remains incompletely understood. The goal of this study

was to determine factors associated with CM in patients receiving implantable cardioverter defibrillators (ICD). We hypothesized that preexisted cardiac remodeling is associated with CM.

## Methods

### *Study population*

The Cardiac Memory with ICD (CAMI) prospective study was conducted by Medtronic. The study participants were enrolled at the Beth Israel Deaconess Medical Center (BIDMC), and the data analysis was performed at the Oregon Health & Science University (OHSU). The study was approved by the Institutional Review Boards at the BIDMC and the OHSU. All study participants signed an informed consent before entering the study.

The CAMI study included adults above 18 years of age who have received a Medtronic market released dual-chamber ICD with chronically implanted (for at least 3 months,  $\geq 90$  days) Medtronic RV leads with SVC coil and RV ring electrode (Sprint Fidelis, Sprint Quattro Secure 6947, Sprint Quattro 6944, etc.) for approved indications. The RV tip location must be in RV apex. Patients must have sinus rhythm with 1:1 AV conduction at physiological heart rates at baseline.

Exclusion criteria were: (1) a history of unstable angina pectoris within the last 3 months unless treated by coronary intervention; (2) inability to tolerate DDD pacing or AAI pacing due to subjective discomfort, heart failure, or other reasons; (3) anti-tachycardia pacing or shock therapy from ICD for spontaneous tachyarrhythmia episodes for the last 3 months; (4) more than 1% of RV pacing for the last 3 months (confirmed by the ICD device interrogation); (5) NYHA class III/IV congestive heart failure; (6) left ventricular ejection fraction (LVEF)  $< 20\%$ ; (7) baseline ECG abnormalities (complete left bundle branch block, T wave inversions secondary to

left ventricular hypertrophy) precluding expression of CM; (8) inaccessible for follow-up at the study center.

### ***ECG recording and pacing protocol: induction of cardiac memory***

At the baseline study visit, resting supine 12 lead electrocardiogram (ECG) was recorded using a MAC 5000 electrocardiograph (GE Marquette, Milwaukee, WI), in AAI and DDD mode with a short AV delay at a rate 10% faster than presented sinus rhythm. Then, ICD devices were programmed in the DDD mode with a short (100-120 ms) paced and sensed AV delay and lower rate as clinically indicated.

The second study visit was conducted after seven days of ventricular pacing. During the follow-up visit, resting 12-lead ECG was recorded first in DDD mode, and then in AAI mode. The pacing rate during ECG recording on a follow-up visit maintained the same as at the baseline ECG recording.

### ***Measurement of cardiac memory on the body surface vectorcardiogram***

The raw digital 12-lead ECG signal (sampling rate 500Hz, amplitude resolution 1 $\mu$ V) was analyzed at OHSU, using MATLAB (MathWorks, Inc, Natick, MA) software application. The software code for VCG analysis is provided at [https://physionet.org/physiotools/global\\_electrical\\_heterogeneity/](https://physionet.org/physiotools/global_electrical_heterogeneity/), <https://github.com/Tereshchenkolab/Origin>, and [https://github.com/Tereshchenkolab/cardiac\\_memory](https://github.com/Tereshchenkolab/cardiac_memory). Kors matrix<sup>12</sup> was used to transform the 12-lead ECG into orthogonal XYZ ECG. All 10-second ECG recordings were reviewed, and all beats were manually labeled (LGT). Ectopic beats, fusion beats, and artifact-distorted beats were excluded from the analysis. Four types of median beats were constructed: AAI mode atrial-paced ventricular-sensed (APVS) beat recorded on the study day one (AAI-1) and day seven (AAI-7), and DDD mode atrial-paced ventricular-paced (APVP) beat recorded on the study day one

(DDD-1) and day seven (DDD-7). The heart vector origin point was identified as previously described.<sup>13</sup> Fiducial points (QRS onset and offset, and T offset) were automatically detected on a vector magnitude. Accuracy of the origin point and fiducial point detection was verified using a visual aid (KTH, LGT). Spatial peak and area QRS, T, and spatial ventricular gradient (SVG) vectors were defined as previously described,<sup>14</sup> and their direction (azimuth and elevation) and magnitude were measured. The scalar value of SVG was measured by the sum absolute QRST integral (SAI QRST)<sup>15, 16</sup> and QT integral on vector magnitude signal (iVMQT).<sup>14</sup>

CM was quantified after seven days of ventricular pacing, as the degree of alignment between VP QRS vector ( $QRS_{DDD-7}$ ) and VS T vector ( $T_{AAI-7}$ ), measured as  $QRS_{DDD-7}-T_{AAI-7}$  angle. Changes in ventricular repolarization were assessed as  $T_{AAI-1}-T_{AAI-7}$  and  $T_{DDD-1}-T_{DDD-7}$ , as well as  $T_{AAI-1}-T_{DDD-1}$  and  $T_{AAI-7}-T_{DDD-7}$  angles.

The difference in ventricular activation between VS and VP QRS vectors was measured by  $QRS_{AAI-7}-QRS_{DDD-7}$  angle. To eliminate an error due to possible differences in ECG leads placement between days one and seven, most angles were measured on the same day recordings. To assess a possible error due to ECG leads placement on two different days, we measured spatial angles  $QRS_{DDD-1}-QRS_{DDD-7}$  and  $QRS_{AAI-1}-QRS_{AAI-7}$ , and an agreement between angles  $QRS_{AAI-7}-QRS_{DDD-7}$  and  $QRS_{AAI-1}-QRS_{DDD-1}$ .

### ***Ventricular pacing vector***

On VCG, VP vector was defined as a median VP spike calculated on the 10-sec recording.

### ***Statistical analyses***

Distribution of all variables was evaluated. Normally distributed continuous variables were presented as mean  $\pm$  standard deviation (SD). Paired *t*-test was used to compare normally

distributed VCG parameters at different pacing modes, at baseline and after seven days of ventricular pacing.

Circular statistics were used to analyze circular variables (spatial angles, azimuth, and elevation). To describe circular variable, mean circular direction and 95% confidence interval (CI) were reported. Non-uniformity of the circular variable distribution was confirmed by the Rayleigh test and the Kuiper test for all studied circular variables. Paired comparison of circular variables was performed using the Hotelling's paired test. The circular-circular correlation coefficients between two circular variables were calculated by the Fisher & Lee method. The circular-linear correlation coefficients were calculated by the Fisher, Mardia & Jupp method. The Watson U-square statistic and the Kuiper statistics were used for two-sample tests for circular variables. To account for multiple testing in correlation analyses, the correlation was considered statistically significant if the P-value was less than 0.001.

To determine associations of demographic and clinical characteristics with changes in T and QRS vectors over the course of 7 days, we conducted longitudinal analysis and constructed two sets of mixed models. One set of models was built to predict changes in direction and magnitude of T area vector, separately in the AAI (VS) mode and DDD (VP) mode. Another set of models was built to predict changes in the direction and magnitude of the QRS area vector in DDD (VP) mode. As there was prominent person-to-person variability in QRS and T vector changes, we constructed mixed models with a random slope and intercept. The Hausman specification test confirmed the consistency of random effect estimates for all models. We used unstructured covariance structure. A likelihood ratio test confirmed a better model fit for a random slope, for all models. To test our hypothesis that preexisted remodeling can affect the development of CM, we constructed two models. Model 1 was adjusted for age, sex, and two major causes of



preexisted CM: a history of MI and VT. Model 2 was in addition adjusted for other known factors affecting cardiac remodeling: LVEF, history of diabetes, hypertension, use of angiotensin-converting enzyme inhibitors (ACEi) or angiotensin receptor blockers (ARBs), and class III antiarrhythmic (AA) drugs. To adjust for possible unmeasured confounders (e.g. due to differences in ECG leads location in days 1 and 7, or unmeasured disease-related factors), both models 1 and 2 were adjusted for longitudinal change in corresponding QRS variable. Model of T (and SVG) azimuth change was adjusted for QRS azimuth change. Model of T (and SVG) elevation change was adjusted for QRS elevation change. Model of T area change was adjusted for QRS area change. In addition, we tested the hypothesis that T azimuth (and T area) change during abnormal activation (in DDD mode) is associated with QRS azimuth (and QRS area) change, adjusting for the same confounders in models 1 and 2. In mixed models, a P value less than 0.05 was considered significant.

STATA MP 16 (StataCorp LP, College Station, TX) and Oriana-Circular Statistics 4 (Kovach Computing Services, Pentraeth, Wales, UK) were used for statistical analyses.

## **Results**

### ***Study population***

Clinical characteristics of the study participants are shown in Table 1. Most of the study participants were men with ischemic cardiomyopathy and ICD implanted for primary prevention of sudden cardiac death (SCD). Of note, 85% had a history of VT, and nearly half had a sustained VT. The vast majority of participants were on beta-blockers and ACEi/ARBs, and one-third of participants received class III antiarrhythmic medications (sotalol or amiodarone).

### ***Development of cardiac memory***

Mean CM angle ( $\mu$ ) was  $67.5^\circ$  (95%CI  $47.6^\circ - 87.4^\circ$ ); median  $58.2^\circ$ ; length of mean vector  $r$  was 0.727; concentration ( $\kappa$ ) was 2.2; circular variance 0.27; circular SD  $45.7^\circ$ .

In paired comparison, there were no differences in RR' interval across all four recordings (Table 2). At baseline, in APVS AAI-1 beat, QRS vector pointed to the left and slightly backward, whereas the T vector pointed straight forward (indicating preceding remodeling), resulting in a wide baseline QRS-T angle.

Ventricular pacing in day one (APVP DDD-1 beat) caused QT prolongation, QRS widening, rotation of QRS vector further backward and up, rotation of T vector down and leftward, and further widening of QRS-T angle. Notably, the direction of Wilson's SVG vector did not change, whereas its magnitude slightly increased. Magnitudes of QRS and T vectors and areas also increased (Table 2 and Supplemental Table 1).

After seven days of VP and return to normal activation (APVS AAI-7 beat), QRS vector returned to the same direction as in APVS AAI-1 beat. QT and QRS intervals, QRS-T angle, and SVG magnitude in AAI-7 did not differ from AAI-1. As expected, CM on APVS beat manifested by prominent T vector magnitude enlargement, increased SVG and SAI QRST, and dramatic changes in T vector direction (turned sharply to the right and upward), and SVG vector direction (turned upward and backward).

On the 7<sup>th</sup> day, we observed very similar differences between APVS and APVP beats (AAI-7 vs. DDD-7), as on the first study day. Neither magnitude nor direction of Wilson's SVG differed between APVS and APVP beats.

Comparison of APVP DDD-1 and DDD-7 beats revealed no differences in direction and magnitude of the QRS vector, the direction of the T vector, and QRS-T angle. However,

direction of SVG vector changed dramatically (turned upward and backward), and magnitudes of T, SVG, and SAI QRST significantly decreased. Development of CM is shown in Figure 1.

### ***Baseline repolarization characteristics associated with cardiac memory***

CM angle perfectly ( $r = -0.972$ ) correlated with  $T_{AAI-7}-T_{DDD-7}$  angle that reflects difference in repolarization in two different activation patterns after development of CM (Figure 2).

Correlations between CM ( $QRS_{DDD-7}-T_{AAI-7}$ ) angle and  $T_{AAI-7}-T_{AAI-7}$  ( $r = -0.198$ ),  $T_{DDD-1}-T_{DDD-7}$  ( $r = -0.081$ ), and  $T_{AAI-1}-T_{DDD-1}$  ( $r = -0.373$ ) angles was weak and non-significant.

$T_{AAI-1}-T_{AAI-7}$  angle negatively correlated with baseline  $T_{AAI-1}$  peak magnitude ( $r = -0.738$ ;  $P < 0.0001$ ) and  $T_{AAI-1}$  area ( $r = -0.720$ ;  $P < 0.0001$ ), and positively correlated with  $T_{AAI-1}$  azimuth (Figure 2), both  $T_{AAI-1}$  peak azimuth ( $r = 0.623$ ;  $P < 0.0001$ ) and  $T_{AAI-1}$  area azimuth ( $r = 0.631$ ;  $P < 0.0001$ ). Baseline QRS- $T_{AAI-1}$  angle negatively correlated with  $T_{AAI-1}-T_{AAI-7}$  angle ( $r = -0.692$ ;  $P < 0.0001$ ; Figure 2).

### ***Baseline characteristics associated with ventricular activation pattern during RV pacing***

The difference in ventricular activation between VS and VP QRS vectors as measured by  $QRS_{AAI-7}-QRS_{DDD-7}$  angle was on average  $77.4^\circ$ ; length of mean vector 0.927; median  $82.6^\circ$  (95%CI  $67.7^\circ - 87.2^\circ$ ). In the paired analysis, there was no difference between  $QRS_{AAI-7}-QRS_{DDD-7}$  and  $QRS_{AAI-1}-QRS_{DDD-1}$  angles. Possible error due to variations in ECG electrodes placement was below 10 degrees. Mean  $QRS_{AAI-1}-QRS_{AAI-7}$  angle was  $7.5^\circ$ ; length of mean vector 0.997; median  $6.5^\circ$  (95%CI  $5.5^\circ-9.5^\circ$ ). Mean  $QRS_{DDD-1}-QRS_{DDD-7}$  angle was  $9.6^\circ$ ; length of mean vector 0.976; median  $5.0^\circ$  (95%CI  $4.1^\circ-15.1^\circ$ ).

We observed a significant correlation between baseline APVP (DDD-1) repolarization characteristics and differences in ventricular activation in AAI and DDD mode after CM has

been developed, as measured by QRS<sub>AAI-7</sub>-QRS<sub>DDD-7</sub> angle. Baseline APVP T<sub>DDD-1</sub> azimuth correlated with QRS<sub>AAI-7</sub>-QRS<sub>DDD-7</sub> angle ( $r = 0.604$ ;  $P < 0.001$ ; Figure 3), but not QRS<sub>AAI-1</sub>-QRS<sub>DDD-1</sub> angle ( $r = 0.355$ ; NS). Baseline APVP QT<sub>DDD-1</sub> interval was moderately strongly correlated with APVP QRS<sub>DDD-7</sub> azimuth ( $r = 0.623$ ;  $P < 0.001$ ; Figure 3), whereas the correlation of APVS QT<sub>AAI-1</sub> interval with APVP QRS<sub>DDD-7</sub> azimuth was weak ( $r = 0.436$ ;  $P < 0.05$ ). Baseline APVS T<sub>AAI-1</sub> vector magnitude ( $r = 0.653$ ) and T<sub>AAI-1</sub> area ( $r = 0.601$ ) positively correlated with QRS<sub>DDD-7</sub> vector elevation on the 7<sup>th</sup> day during ventricular pacing (Figure 3), but not in a normal ventricular conduction (QRS<sub>AAI-7</sub> vector elevation:  $r = 0.261$  for T<sub>AAI-1</sub> vector magnitude and  $r = 0.333$  for T<sub>AAI-1</sub> area).

### ***The direction of Ventricular Pacing vector***

VP vector was directed upward and rightward, consistently with implanted RV lead. In the paired analysis, there was no difference in VP vector azimuth recorded on day one versus day 7 ( $165^\circ$ ; (95%CI  $157^\circ$ - $173^\circ$ ) vs.  $173^\circ$ ; (95%CI  $157^\circ$ - $189^\circ$ );  $P = 0.099$ ). VP vector elevation slightly decreased by  $10^\circ$  one week after RV lead implantation: V<sub>DDD-1</sub> elevation  $110^\circ$ ; (95%CI  $102^\circ$ - $117^\circ$ ) vs. V<sub>DDD-7</sub> elevation  $100^\circ$  (95%CI  $91^\circ$ - $110^\circ$ );  $P = 0.006$ . There were no meaningful correlations of VP vector direction with cardiac activation or repolarization metrics.

### ***Clinical characteristics associated with cardiac memory***

We observed prominent person-to-person variability in changes of T and SVG vectors that manifest CM (Figure 4). Mixed models analyses results showed that in AAI mode, T azimuth displayed the most dramatic changes from day 1 to day 7 (Table 3). History of MI and female sex was associated with the significant opposite effect on T azimuth, counteracting the development of CM. Change in T elevation was associated only with a change in QRS elevation, but not any clinical or demographic characteristics. History of MI, history of VT, and history of

class III antiarrhythmics use was associated with T magnitude changes (Table 3). In DDD mode, history of VT was associated with changes in SVG azimuth during seven days of follow-up. History of MI, VT, and female sex was associated with changes in SVG elevation, reducing the degree of CM manifestation (Table 3). Similarly, female sex and VT history were associated with T magnitude changes in DDD mode, offsetting the development of CM.

In an adjusted mixed model analysis, we detected changes in ventricular activation as a manifestation of CM. In DDD mode, we observed significant changes in QRS azimuth and area, from day 1 to day 7 (Table 4). Female sex and history of MI were associated with a reduction of QRS azimuth changes, whereas diabetes and LVEF worsening were associated with greater QRS azimuth changes. Similar associations were observed for QRS area. In AAI mode, there were no statistically significant changes in QRS vector direction and magnitude from day 1 to day 7.

## Discussion

In this prospective study of CM in ICD patients, we observed several novel findings. First, we showed that existing cardiac remodeling due to MI and VT significantly affects the degree of CM in response to RV pacing. Secondly, we, for the first time, demonstrated sex differences in CM development. After adjustment for the type of cardiomyopathy, degree of LV dysfunction, use of medications, and major cardiovascular risk factors (hypertension and diabetes), women developed less CM as compared to men. Thirdly, we noticed that in participants with preceded cardiac remodeling, the CM is associated with significant changes in cardiac activation. While repolarization memory “remembers” abnormal activation after baseline activation has been restored, activation memory “remembers” normal baseline activation during abnormal (VP) activation, resulting in a smaller angle between QRS vectors of normal (baseline) and abnormal

(VP) activation. Further studies of repolarization and activation memory are needed to understand mechanisms and clinical significance of CM.

### ***Cardiac remodeling is associated with the degree of repolarization memory***

We observed that the more abnormal baseline repolarization was, the less repolarization memory had been developed in response to ventricular pacing. The wider the baseline spatial QRS-T angle was, the less repolarization memory was developed. The larger baseline T area was, the less repolarization memory was developed. Similarly, the more abnormal was the direction of the baseline T vector, the less repolarization memory was developed. The abnormal (rightward-forward) direction of T vector, large magnitude of T, and wide QRS-T angle are well-known signs of earlier cardiac memory or cardiac remodeling. A more negative T vector azimuth in CM patients with DDD RV pacing<sup>17</sup> is consistent with our finding of less repolarization memory with more negative T vector azimuth (Figure 2). Accordingly, in the mixed model analyses adjusted for a change in cardiac activation between days 1 and 7, LV systolic function, known risk factors, and use of medications known to affect the development of cardiac memory, history of MI and VT strongly counteracted repolarization changes. History of MI and VT nearly completely canceled manifestation of CM, both in AAI and DDD modes. Thus, the robust development of typical CM in response to RV pacing suggests an absence or a minimal degree of preexisted cardiac remodeling. In contrast, weak repolarization response to RV pacing implies that repolarization ion channels in ventricular cardiomyocytes had been already remodeled, as shown in many *in vitro* studies,<sup>7, 18, 19</sup> and display a saturation of response.

### ***Women develop less cardiac memory than men***

Previous studies using animal models<sup>19-21</sup> or human subjects,<sup>6, 9, 11</sup> did not investigate sex differences in CM. Interestingly, in our study, sex was strongly associated with the degree of CM

manifestation. In fully adjusted mixed models, female sex was strongly and independently associated with a significantly smaller amount of CM, suggesting that women developed less dyssynchrony in response to RV pacing, as compared to men. Female sex nearly completely canceled manifestation of CM, both in AAI and DDD modes (Table 3). The finding of sex differences in CM is novel and has an important clinical significance. It is well known that women benefit from cardiac resynchronization therapy (CRT) more than men.<sup>22</sup> We speculate that sex differences in CM contribute to sex differences in CRT response.

***“Activation memory” is another manifestation of cardiac memory***

A large number of previous studies described CM as a repolarization phenotype.<sup>6, 9, 11, 18, 21, 23</sup> In this study, we, for the first time described the manifestation of activation memory. In addition to repolarization memory, which manifests by the wide angle between T vectors in AAI and DDD modes on the 7<sup>th</sup> day, activation memory is revealed by the narrow angle between QRS vectors in AAI and DDD modes on the 7<sup>th</sup> day. Repolarization memory manifests by  $T_{AAI-7}$  vector aligning with abnormal activation vector; repolarization “remembers” abnormal activation. In turn, activation memory manifests during continued abnormal activation, by abnormal activation vector aligning with normal activation vector. Activation memory is likely a compensatory mechanism attempting to minimize dyssynchrony developing in response to sustained abnormal activation. Activation and repolarization are two phases of the repeated cycle, following one after another. Development of repolarization memory affects refractoriness in ventricles, which, in turn, affects the way how ventricles activate. Further studies of activation memory mechanisms and its clinical significance are needed.

### ***Spatial ventricular gradient reflects cardiac memory***

Our results one more time<sup>24</sup> confirmed Wilson's ventricular gradient<sup>25</sup> concept, suggesting that the SVG is largely independent of the ventricular activation sequence (no difference between  $SVG_{AAI-7}$  and  $SVG_{DDD-7}$ ).<sup>26, 27</sup> SVG is determined by the heterogeneity in the whole area under the action potential across the heart, rather than by heterogeneity in the action potential duration alone.<sup>26-28</sup> SVG vector tracked the development of CM better than T vector (Table 2), especially in DDD mode. Thus, change in SVG direction can be used to assess CM in persistently abnormal activation (during continuous ventricular pacing, bundle branch block).

### ***Limitations***

Several limitations of this study have to be considered. First of all, the study size was small. Validation of the study findings in a larger study is required. We were not able to adjust our analysis for the percentage of RV pacing during the study, as the data was not collected.



## References

1. Tse HF and Lau CP. Long-term effect of right ventricular pacing on myocardial perfusion and function. *J Am Coll Cardiol.* 1997;29:744-9.
2. Sweeney MO, Hellkamp AS, Ellenbogen KA, Greenspon AJ, Freedman RA, Lee KL and Lamas GA. Adverse effect of ventricular pacing on heart failure and atrial fibrillation among patients with normal baseline QRS duration in a clinical trial of pacemaker therapy for sinus node dysfunction. *Circulation.* 2003;107:2932-2937.
3. Khurshid S, Epstein AE, Verdino RJ, Lin D, Goldberg LR, Marchlinski FE and Frankel DS. Incidence and predictors of right ventricular pacing-induced cardiomyopathy. *Heart Rhythm.* 2014;11:1619-25.
4. Kiehl EL, Makki T, Kumar R, Gumber D, Kwon DH, Rickard JW, Kanj M, Wazni OM, Saliba WI, Varma N, Wilkoff BL and Cantillon DJ. Incidence and predictors of right ventricular pacing-induced cardiomyopathy in patients with complete atrioventricular block and preserved left ventricular systolic function. *Heart Rhythm.* 2016;13:2272-2278.
5. Sharma PS, Vijayaraman P and Ellenbogen KA. Permanent His bundle pacing: shaping the future of physiological ventricular pacing. *Nat Rev Cardiol.* 2019.
6. Rosen MR and Bergfeldt L. Cardiac memory: The slippery slope twixt normalcy and pathology. *Trends in cardiovascular medicine.* 2015;25:687-96.
7. Ozgen N and Rosen MR. Cardiac memory: a work in progress. *Heart Rhythm.* 2009;6:564-570.
8. Sosunov EA, Anyukhovskiy EP and Rosen MR. Altered ventricular stretch contributes to initiation of cardiac memory. *Heart Rhythm.* 2008;5:106-113.

9. Shvilkin A, Huang HD and Josephson ME. Cardiac memory: diagnostic tool in the making. *Circ Arrhythm Electrophysiol.* 2015;8:475-82.
10. Waks JW, Steinhaus DA, Shvilkin A and Kramer DB. Post-pacemaker T-wave Inversions: Cardiac Memory. *Am J Med.* 2016;129:170-2.
11. Shvilkin A, Bojovic B, Vajdic B, Gussak I, Zimetbaum P and Josephson ME. Vectorcardiographic determinants of cardiac memory during normal ventricular activation and continuous ventricular pacing. *Heart Rhythm.* 2009;6:943-948.
12. Kors JA, van HG, Sittig AC and van Bommel JH. Reconstruction of the Frank vectorcardiogram from standard electrocardiographic leads: diagnostic comparison of different methods. *EurHeart J.* 1990;11:1083-1092.
13. Perez-Alday EA, Li-Pershing Y, Bender A, Hamilton C, Thomas JA, Johnson K, Lee TL, Gonzales R, Li A, Newton K and Tereshchenko LG. Importance of the heart vector origin point definition for an ECG analysis: The Atherosclerosis Risk in Communities (ARIC) study. *Comput Biol Med.* 2019;104:127-138.
14. Thomas JA, E AP-A, Junell A, Newton K, Hamilton C, Li-Pershing Y, German D, Bender A and Tereshchenko LG. Vectorcardiogram in athletes: The Sun Valley Ski Study. *Ann Noninvasive Electrocardiol.* 2019;24:e12614.
15. Sur S, Han L and Tereshchenko LG. Comparison of sum absolute QRST integral, and temporal variability in depolarization and repolarization, measured by dynamic vectorcardiography approach, in healthy men and women. *PLoS One.* 2013;8:e57175.
16. Tereshchenko LG, Cheng A, Fetis BJ, Marine JE, Spragg DD, Sinha S, Calkins H, Tomaselli GF and Berger RD. Ventricular arrhythmia is predicted by sum absolute QRST integral but not by QRS width. *J Electrocardiol.* 2010;43:548-52.

17. Wecke L, Rubulis A, Lundahl G, Rosen MR and Bergfeldt L. Right ventricular pacing-induced electrophysiological remodeling in the human heart and its relationship to cardiac memory. *Heart Rhythm*. 2007;4:1477-1486.
18. Yu H, McKinnon D, Dixon JE, Gao J, Wymore R, Cohen IS, Danilo P, Jr., Shvilkin A, Anyukhovskiy EP, Sosunov EA, Hara M and Rosen MR. Transient outward current, Ito1, is altered in cardiac memory. *Circulation*. 1999;99:1898-1905.
19. Obreztkhikova MN, Patberg KW, Plotnikov AN, Ozgen N, Shlapakova IN, Rybin AV, Sosunov EA, Danilo P, Jr., Anyukhovskiy EP, Robinson RB and Rosen MR. I(Kr) contributes to the altered ventricular repolarization that determines long-term cardiac memory. *CardiovascRes*. 2006;71:88-96.
20. Shvilkin A, Danilo P, Jr., Wang J, Burkhoff D, Anyukhovskiy EP, Sosunov EA, Hara M and Rosen MR. Evolution and resolution of long-term cardiac memory. *Circulation*. 1998;97:1810-1817.
21. Costard-Jackle A, Goetsch B, Antz M and Franz MR. Slow and long-lasting modulation of myocardial repolarization produced by ectopic activation in isolated rabbit hearts. Evidence for cardiac "memory". *Circulation*. 1989;80:1412-20.
22. Gillis AM. Atrial Fibrillation and Ventricular Arrhythmias: Sex Differences in Electrophysiology, Epidemiology, Clinical Presentation, and Clinical Outcomes. *Circulation*. 2017;135:593-608.
23. Coronel R, Opthof T, Plotnikov AN, Wilms-Schopman FJ, Shlapakova IN, Danilo P, Jr., Sosunov EA, Anyukhovskiy EP, Janse MJ and Rosen MR. Long-term cardiac memory in canine heart is associated with the evolution of a transmural repolarization gradient. *CardiovascRes*. 2007;74:416-425.

24. Tereshchenko LG, Ghanem RN, Abeyratne A and Swerdlow CD. Intracardiac QT integral on far-field ICD electrogram predicts sustained ventricular tachyarrhythmias in ICD patients. *Heart Rhythm*. 2011;8:1889-1894.
25. Wilson FN, Macleod AG and Barker PS. The distribution of the action currents produced by heart muscle and other excitable tissues immersed in extensive conducting media. *The Journal of general physiology*. 1933;16:423-456.
26. Geselowitz DB. The ventricular gradient revisited: relation to the area under the action potential. *IEEE Trans BiomedEng*. 1983;30:76-77.
27. Plonsey R. A contemporary view of the ventricular gradient of Wilson. *J Electrocardiol*. 1979;12:337-341.
28. Waks JW and Tereshchenko LG. Global electrical heterogeneity: A review of the spatial ventricular gradient. *J Electrocardiol*. 2016;49:824-830.



**Table 2. Cardiac memory development**

| ECG and VCG parameters                     | AAI-1             | DDD-1           | AAI-7            | DDD-7           | P <sub>AAI1-AAI7</sub> | P <sub>DDD1-DDD7</sub> | P <sub>AAI1-DDD1</sub> | P <sub>AAI7-DDD7</sub> |
|--------------------------------------------|-------------------|-----------------|------------------|-----------------|------------------------|------------------------|------------------------|------------------------|
| RR interval(SD), ms                        | 830(125)          | 825(119)        | 833(122)         | 825(118)        | 0.406                  | 0.926                  | 0.456                  | 0.203                  |
| QT interval(SD), ms                        | 407(45)           | 465(53)         | 411(53)          | 456(43)         | 0.480                  | 0.204                  | <0.0001                | <0.0001                |
| QRS duration(SD), ms                       | 111(17)           | 162(23)         | 113(15)          | 167(20)         | 0.492                  | 0.263                  | <0.0001                | <0.0001                |
| Spatial QRS area(SD), mV*ms                | 50(27)            | 120(41)         | 50(24)           | 120(36)         | 0.611                  | 0.902                  | <0.0001                | <0.0001                |
| Spatial area QRS vector azimuth(95%CI),°   | 37(25-49)         | 99(90-108)      | 37(24-49)        | 104(96-111)     | 0.198                  | 0.384                  | <0.0001                | <0.0001                |
| Spatial area QRS vector elevation(95%CI),° | 82(74-90)         | 122(117-128)    | 78(70-86)        | 124(117-130)    | 0.058                  | 0.202                  | <0.0001                | <0.0001                |
| Spatial T area(SD), mV*ms                  | 39(29)            | 142(55)         | 54(25)           | 94(35)          | <b>0.007</b>           | <0.0001                | <0.0001                | <b>0.0002</b>          |
| Spatial area T vector azimuth(95%CI),°     | -102(-117 to -88) | -65(-73 to -57) | 166(156 to -175) | -71(-79 to -62) | <0.0001                | 0.123                  | <0.0001                | <0.0001                |
| Spatial area T vector elevation(95%CI),°   | 87(80-95)         | 56(50-62)       | 118(110-126)     | 55(48-61)       | <0.0001                | 0.423                  | <0.0001                | <0.0001                |
| Wilson's (area) SVG (SD), mV*ms            | 36(22)            | 45(31)          | 44(17)           | 42(14)          | 0.212                  | 0.615                  | <b>0.027</b>           | 0.209                  |
| Spatial area SVG vector azimuth(95%CI),°   | 7(-15 to 29)      | 1(-18 to 20)    | 91(78-105)       | 76(52-101)      | <0.0001                | <0.0001                | 0.308                  | 0.118                  |
| Spatial area SVG vector elevation(95%CI),° | 69(60-78)         | 70(60-81)       | 107(96-118)      | 108(95-121)     | <0.0001                | <0.0001                | 0.510                  | 0.910                  |
| SAI QRST(SD), mV*ms                        | 157(74)           | 415(141)        | 181(61)          | 329(90)         | <b>0.006</b>           | <b>0.0001</b>          | <0.0001                | <0.0001                |
| Vector magnitude QT integral(SD), mV*ms    | 106(50)           | 268(91)         | 118(42)          | 219(66)         | <b>0.022</b>           | <b>0.0001</b>          | <0.0001                | <b>0.0001</b>          |
| Spatial area QRS-T angle(95%CI),°          | 136(121-151)      | 164(159-169)    | 131(120-141)     | 168(165-171)    | 0.107                  | 0.218                  | <b>0.0005</b>          | <0.0001                |

**Table 3. Demographic and clinical characteristics associated with cardiac memory**

| Characteristic                                | Area T azimuth (95%CI),° | P                 | Outcome variables in AAI mode |                   |                        |                   | Outcome variables in DDD mode |                   |                              |                   |                        |                   |
|-----------------------------------------------|--------------------------|-------------------|-------------------------------|-------------------|------------------------|-------------------|-------------------------------|-------------------|------------------------------|-------------------|------------------------|-------------------|
|                                               |                          |                   | Area T elevation (95%CI),°    | P                 | T area (95%CI), mV*ms  | P                 | Area SVG azimuth (95%CI),°    | P                 | Area SVG elevation (95%CI),° | P                 | T area (95%CI), mV*ms  | P                 |
| M 1 Cardiac Memory                            | <b>+132(81-182)</b>      | <b>&lt;0.0001</b> | <b>+29(20-37)</b>             | <b>&lt;0.0001</b> | <b>+15(7-24)</b>       | <b>0.001</b>      | <b>+45(21-69)</b>             | <b>&lt;0.0001</b> | <b>+37(26-50)</b>            | <b>&lt;0.0001</b> | <b>-48(-60 to -35)</b> | <b>&lt;0.0001</b> |
| M 2 measured by outcome (change Day 1- Day 7) | <b>+132(80-184)</b>      | <b>&lt;0.0001</b> | <b>+29(21-38)</b>             | <b>&lt;0.0001</b> | <b>+15(6 – 24)</b>     | <b>&lt;0.0001</b> | <b>+45(23-69)</b>             | <b>&lt;0.0001</b> | <b>+37(26-48)</b>            | <b>&lt;0.0001</b> | <b>-48(-60 to -36)</b> | <b>&lt;0.0001</b> |
| M 1 Corresponding QRS variable*               | -0.4(-1.3 to 0.4)        | 0.297             | <b>-0.5(-0.9 to -0.1)</b>     | <b>0.008</b>      | <b>+0.5(0.1-0.8)</b>   | <b>0.005</b>      | -0.04(-0.8 to 0.7)            | 0.916             | +0.6(-0.1 to 1.2)            | 0.115             | <b>+0.9(0.6-1.1)</b>   | <b>&lt;0.0001</b> |
| M 2                                           | -0.4(-1.4 to 0.7)        | 0.501             | -0.3(-0.7 to 0.06)            | 0.104             | <b>+0.5(0.3 – 0.8)</b> | <b>&lt;0.0001</b> | -0.2(-1.1 to 0.6)             | 0.575             | +0.5(-0.2 to 1.3)            | 0.150             | <b>+0.7(0.5-1.0)</b>   | <b>&lt;0.0001</b> |
| M 1 Age, per 1 y                              | +3(-0.8 to 6)            | 0.132             | +0.01(-0.5 to 0.5)            | 0.967             | +0.2(-0.4 – 0.8)       | 0.570             | +0.3(-2 to 2)                 | 0.812             | +0.3(-0.5 to 1.2)            | 0.449             | -0.1(-1 to 1)          | 0.865             |
| M 2                                           | <b>+4(0.4-8.5)</b>       | <b>0.033</b>      | -0.2(-0.8 to 0.4)             | 0.503             | 0.2(-0.5 – 0.9)        | 0.499             | +0.4(-2.3 to 3.2)             | 0.754             | 0.3(-0.8 to 1.4)             | 0.617             | +0.3(-0.7 to 1.4)      | 0.508             |
| M 1 Female vs. male                           | <b>-110(-201 to -18)</b> | <b>0.019</b>      | -10(-26 to 6)                 | 0.231             | +7(-19 to 32)          | 0.615             | -52(-115 to 12)               | 0.110             | <b>-45(-72 to -18)</b>       | <b>0.001</b>      | <b>+44(15-72)</b>      | <b>0.002</b>      |
| M 2                                           | <b>-162(-268 to -55)</b> | <b>0.003</b>      | -2(-19 to 16)                 | 0.846             | +4(-18 – 26)           | 0.703             | -51(-128 to 26)               | 0.192             | <b>-43(-76 to -11)</b>       | <b>0.009</b>      | <b>+32(3-61)</b>       | <b>0.029</b>      |
| M 1 History of Myocardial Infarction          | <b>-124(-227 to -21)</b> | <b>0.018</b>      | +5(-15 to 24)                 | 0.638             | -15(-32 to 3)          | 0.095             | -17(-75 to 41)                | 0.559             | <b>-24(-46 to -2)</b>        | <b>0.034</b>      | +5(-21 to 31)          | 0.696             |
| M 2                                           | <b>-180(-320 to -40)</b> | <b>0.011</b>      | +19(-1 to 40)                 | 0.065             | <b>-27(-47 to -8)</b>  | <b>0.006</b>      | -31(-108 to 47)               | 0.437             | -20(-49 to 10)               | 0.188             | +0.5(-29 to 30)        | 0.969             |
| M 1 History of Ventricular Tachycardia        | -61(-156 to 34)          | 0.207             | -6(-22 to 9)                  | 0.432             | <b>+22(0.8 – 44)</b>   | <b>0.042</b>      | -57(-122 to 7)                | 0.083             | <b>-30(-55 to -4)</b>        | <b>0.022</b>      | <b>+40(11-69)</b>      | <b>0.006</b>      |
| M 2                                           | -70(-165 to 26)          | 0.153             | -6(-21 to 9)                  | 0.426             | <b>+27(4-46)</b>       | <b>0.007</b>      | <b>-74(-143 to -5)</b>        | <b>0.034</b>      | -27(-56 to 0.8)              | 0.057             | <b>+38(13-63)</b>      | <b>0.003</b>      |
| M2 Class 3 AA drugs                           | +1.2(-74 to 76)          | 0.975             | +8(-2 to 18)                  | 0.137             | <b>-15(-26 to -4)</b>  | <b>0.010</b>      | +19(-105 to 253)              | 0.420             | -1(-19 to 18)                | 0.950             | +13(-8 to 33)          | 0.228             |

Model 1 was adjusted by corresponding QRS variable, age, sex, history of MI, and history of VT. Model 2 was in addition adjusted by LVEF, history of diabetes, hypertension, VT, use of ACEi/ARBs, and class III antiarrhythmic (AA) drugs. Corresponding QRS variable for each model: area QRS azimuth for area T azimuth and area SVG azimuth, area QRS elevation for area T elevation and area SVG elevation, QRS area for T area models.

**Table 4. Demographic and clinical characteristics associated with change in activation (QRS vector) in DDD mode**

| Characteristic |                        | Outcome variables in DDD mode |                   |                         |                   |
|----------------|------------------------|-------------------------------|-------------------|-------------------------|-------------------|
|                |                        | Area QRS azimuth (95%CI), °   | P                 | QRS area (95%CI), mV*ms | P                 |
| M 1            | Activation change      | <b>+10(4-15)</b>              | <b>&lt;0.0001</b> | <b>+28(17-38)</b>       | <b>&lt;0.0001</b> |
| M 2            | (Day 1- Day 7)         | <b>+10(5-15)</b>              | <b>&lt;0.0001</b> | <b>+24(13-36)</b>       | <b>&lt;0.0001</b> |
| M 1            | Corresponding T        | <b>+0.9(0.7-1.1)</b>          | <b>&lt;0.0001</b> | <b>+0.6(0.4-0.8)</b>    | <b>&lt;0.0001</b> |
| M 2            | variable*              | <b>+0.9(0.7-1.0)</b>          | <b>&lt;0.0001</b> | <b>+0.5(0.3-0.7)</b>    | <b>&lt;0.0001</b> |
| M 1            | Age, per 1 y           | +0.1(-0.3 to 0.6)             | 0.639             | +0.3(-0.6 to 1.3)       | 0.523             |
| M 2            |                        | 0.3(-0.02 to 0.7)             | 0.066             | +0.8(-0.3 to 1.8)       | 0.142             |
| M 1            | Female vs. male        | -8(-19 to 5)                  | 0.213             | <b>-30(-60 to 0.1)</b>  | <b>0.051</b>      |
| M 2            |                        | <b>-12(-22 to -2)</b>         | <b>0.023</b>      | <b>-40(-69 to -10)</b>  | <b>0.009</b>      |
| M 1            | History of Myocardial  | -9(-20 to 3)                  | 0.137             | -20(-45 to 4)           | 0.101             |
| M 2            | Infarction             | <b>-17(-28 to -7)</b>         | <b>0.001</b>      | <b>-28(-56 to -28)</b>  | <b>0.050</b>      |
| M 1            | History of Ventricular | +2(-11 to 15)                 | 0.746             | -13(-43 to 17)          | 0.405             |
| M 2            | Tachycardia            | -3(-12 to 7)                  | 0.590             | -20(-47 to 6)           | 0.136             |
| M2             | Class 3 AA drugs M2    | +2(-4 to 8)                   | 0.593             | <b>+24(3-45)</b>        | <b>0.022</b>      |
| M2             | LVEF, per 1%           | <b>-0.8(-1.3 to -0.3)</b>     | <b>0.001</b>      | -0.5(-1.9 to 0.9)       | 0.495             |
| M2             | Diabetes mellitus      | <b>+12(7-19)</b>              | <b>&lt;0.0001</b> | +6.4(-9.4 to 22.3)      | 0.427             |

Model 1 was adjusted for corresponding T variable, age, sex, history of MI, and history of VT. Model 2 was in addition adjusted for LVEF, history of diabetes, hypertension, VT, use of ACEi/ARBs, and class III antiarrhythmic (AA) drugs. Corresponding T variable for each model: area T azimuth for area QRS azimuth, T area for QRS area models.



## Figure legends

**Figure 1.** A representative example of QRS and T loops with corresponding peak vectors in median beats recorded at baseline (AAI-1; green) and after the development of CM (AAI-7; black, and DDD-7; red). Median pacing spike vector is shown as a purple arrow.

**Figure 2. Repolarization memory.** (A) Scatterplot of  $QRS_{DDD-7} - T_{AAI-7}$  angle (y-axis) against  $T_{DDD-7} - T_{AAI-7}$  angle (x-axis). Scatterplot of  $T_{DDD-7} - T_{AAI-7}$  angle (y-axis) against (B)  $T_{AAI-1}$  area (x-axis), (C)  $T_{AAI-1}$  azimuth (x-axis), and (D)  $QRS - T_{AAI-1}$  angle. A linear best fit line is shown.

**Figure 3. Activation memory.** (A) Scatterplot of  $QRS_{AAI-7} - QRS_{DDD-7}$  angle (y-axis) against  $T_{DDD-1}$  azimuth. (B) Scatterplot of  $QRS_{DDD-7}$  azimuth (y-axis) against  $QT_{DDD-1}$  interval. (C) Scatterplot of  $QRS_{DDD-7}$  elevation against  $T_{AAI-1}$  magnitude. A linear best fit is shown.

**Figure 4. A manifestation of cardiac memory in AAI and DDD mode.** Time-series line plots show the change in repolarization from day 1 to day 7, for every study participant. Top panels show the change in T azimuth, T elevation, and area T in AAI mode. Bottom panel shows the change in SVG azimuth, SVG elevation, and area T in DDD mode.

**Figure 1:**

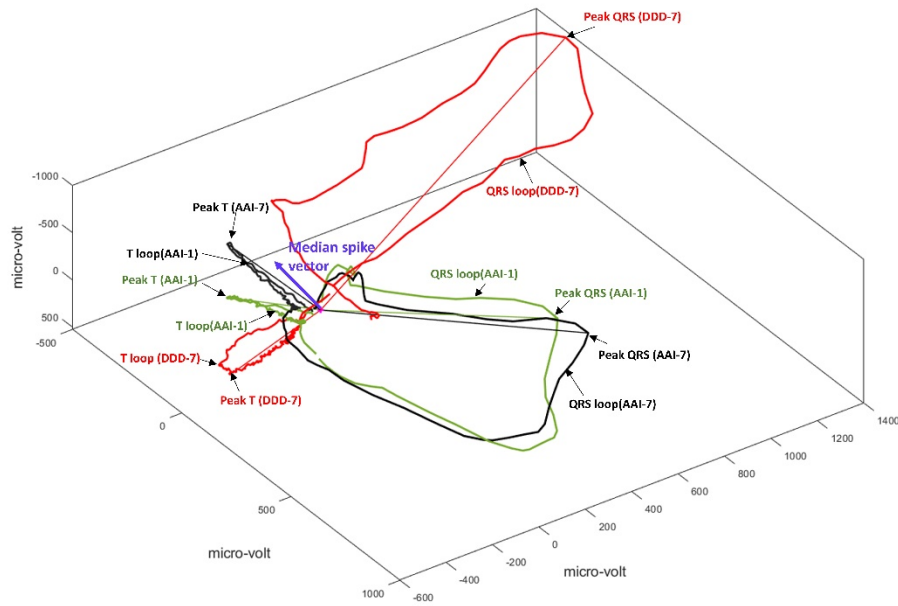

**Figure 2:**

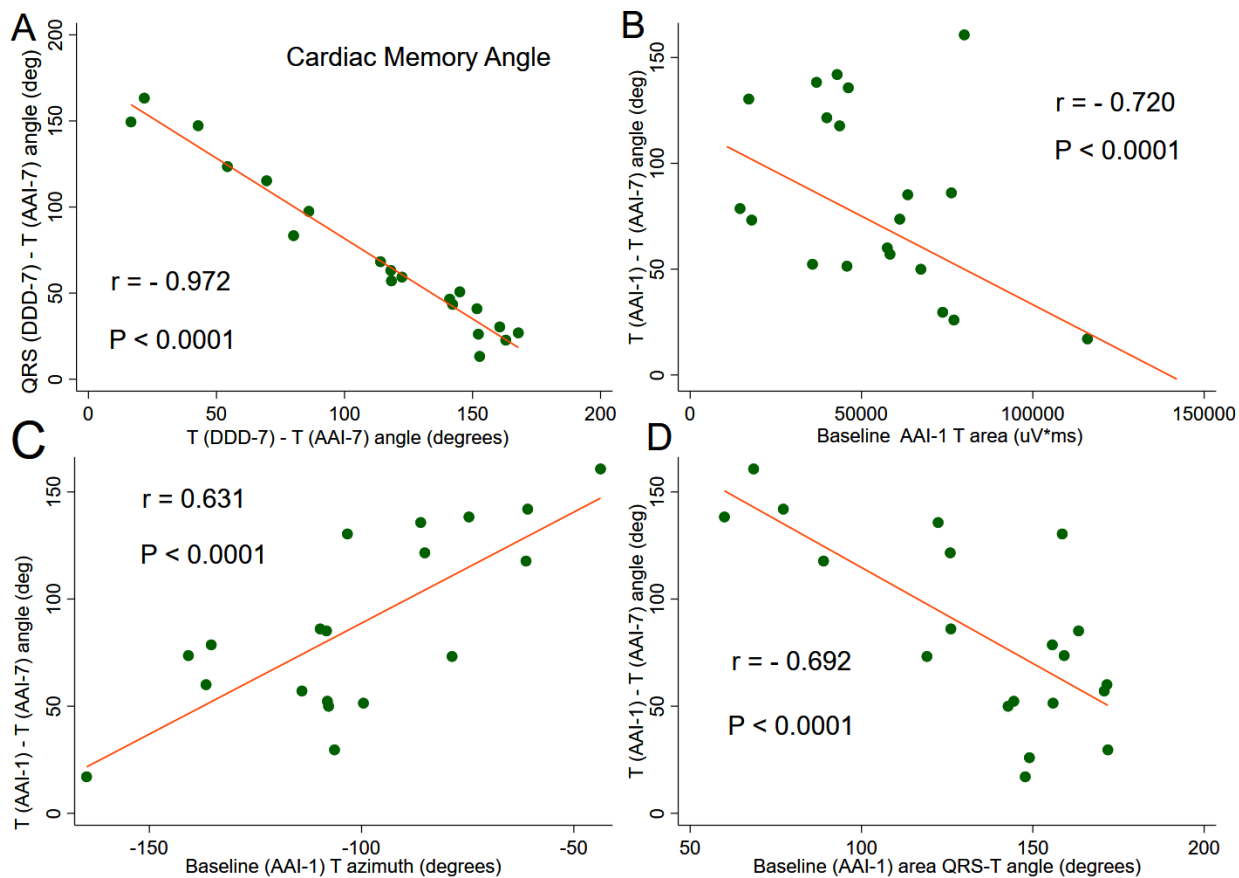

**Figure 3:**

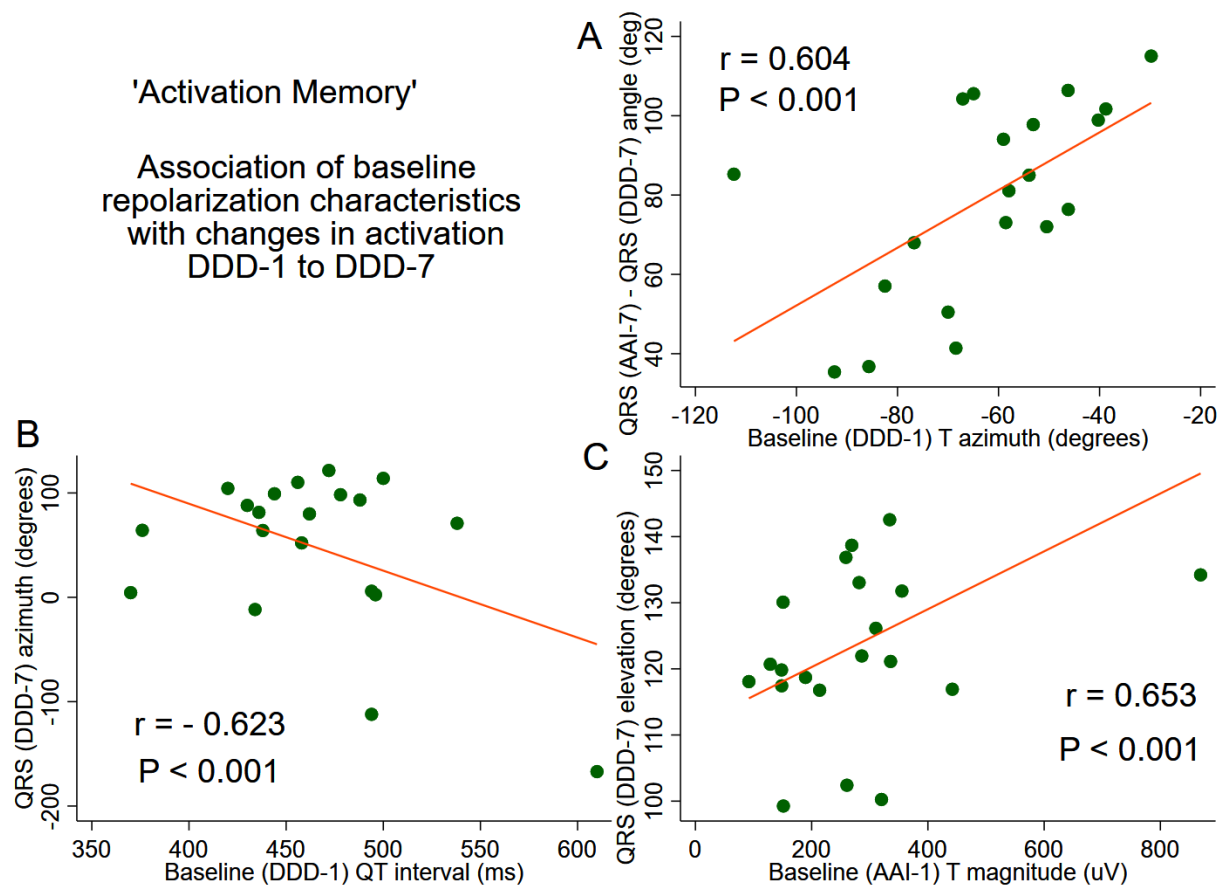

Figure 4:

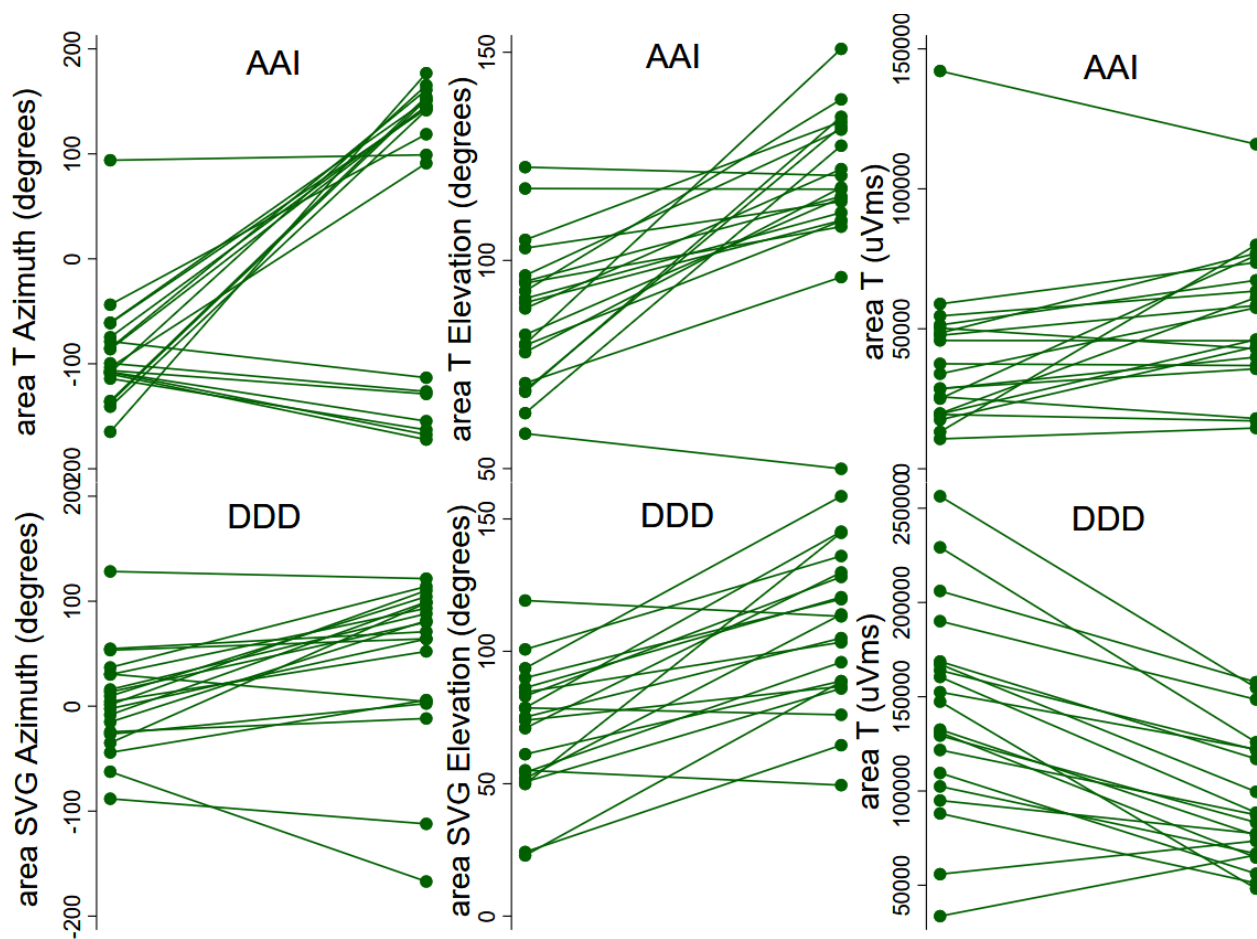

**Supplemental Table 1. Peak vectors measurements of cardiac memory development**

| ECG and VCG parameters                     | AAI-1            | DDD-1           | AAI-7        | DDD-7           | P <sub>AAI1-AAI7</sub> | P <sub>DDD1-DDD7</sub> | P <sub>AAI1-DDD1</sub> | P <sub>AAI7-DDD7</sub> |
|--------------------------------------------|------------------|-----------------|--------------|-----------------|------------------------|------------------------|------------------------|------------------------|
| Spatial peak QRS vector magnitude(SD), mV  | 1.31(0.41)       | 1.45(0.43)      | 1.31(0.35)   | 1.42(0.40)      | 0.907                  | 0.909                  | <b>0.046</b>           | 0.187                  |
| Spatial peak QRS vector azimuth(95%CI),°   | 32(18-46)        | 98(89-106)      | 31(17-44)    | 102(95-110)     | 0.964                  | 0.326                  | <b>&lt;0.0001</b>      | <b>&lt;0.0001</b>      |
| Spatial peak QRS vector elevation(95%CI),° | 81(73-88)        | 121(116-126)    | 78(71-86)    | 124(118-130)    | 0.126                  | 0.160                  | <b>&lt;0.0001</b>      | <b>&lt;0.0001</b>      |
| Spatial peak T vector magnitude(SD), mV    | 0.28(0.17)       | 0.91(0.29)      | 0.38(0.14)   | 0.64(0.17)      | <b>0.003</b>           | <b>&lt;0.0001</b>      | <b>&lt;0.0001</b>      | <b>0.0001</b>          |
| Spatial peak T vector azimuth(95%CI),°     | -92(-109 to -74) | -63(-71 to -54) | 161(140-182) | -67(-77 to -58) | <b>&lt;0.0001</b>      | 0.168                  | <b>&lt;0.0001</b>      | <b>&lt;0.0001</b>      |
| Spatial peak T vector elevation(95%CI),°   | 82(73-92)        | 58(52-63)       | 119(111-128) | 55(50-61)       | <b>&lt;0.0001</b>      | 0.376                  | <b>&lt;0.0001</b>      | <b>&lt;0.0001</b>      |
| Spatial peak SVG vector magnitude(SD), mV  | 0.28(0.17)       | 0.91(0.29)      | 0.38(0.14)   | 0.64(0.17)      | <b>0.003</b>           | <b>&lt;0.0001</b>      | <b>&lt;0.0001</b>      | <b>0.0001</b>          |
| Spatial peak SVG vector azimuth(95%CI),°   | 27(12-43)        | 67(52-81)       | 44(30-57)    | 91(82-101)      | <b>0.001</b>           | <b>0.003</b>           | <b>&lt;0.0001</b>      | <b>&lt;0.0001</b>      |
| Spatial peak SVG vector elevation(95%CI),° | 78(70-85)        | 112(106-119)    | 84(78-91)    | 122(114-130)    | <b>0.001</b>           | <b>0.016</b>           | <b>&lt;0.0001</b>      | <b>&lt;0.0001</b>      |
| Spatial peak QRS-T angle(95%CI),°          | 115(94-135)      | 161(156-166)    | 123(114-134) | 166(162-169)    | 0.435                  | <b>0.025</b>           | <b>0.0001</b>          | <b>&lt;0.0001</b>      |
